# Supplementary material for: Characteristics of Pediatric Mild Traumatic Brain Injury and Recovery in a Concussion Clinic Population
Source: PubMed Central journal article supplement (PMC7670312; doi:10.1001/jamanetworkopen.2020.21463), 2020-11-16
Supplement: jamanetwopen-e2021463-s001.pdf [file jamanetwopen-e2021463-s001.pdf]

## Supplemental Online Content

Rosenbaum PE, Locandro C, Chrisman SPD, et al. Characteristics of pediatric mild traumatic brain injury and recovery in a concussion clinic population. *JAMA Netw Open*. 2020;3(11):e2021463. doi:10.1001/jamanetworkopen.2020.21463

**eTable 1.** Comparison of Patients Who Consented for Follow-Up vs Those Who Did Not

**eTable 2.** Comparison of Patients with Complete Data vs Those Who Were Lost to Observational Follow-Up

**eTable 3.** Event Characteristics by Sex

**eTable 4.** Event Characteristics by Age

**eTable 5.** Acute Injury Severity Surrogates

**eTable 6.** Sex and History of Emotional Distress Interaction

**eTable 7.** Sex and History of Migraine Interaction

This supplemental material has been provided by the authors to give readers additional information about their work.

**eTable 1.** Comparison of Patients Who Consented for Follow-Up vs Those Who Did Not

|                                                                        | Eligibility and consent status |                        | P-value            |
|------------------------------------------------------------------------|--------------------------------|------------------------|--------------------|
|                                                                        | Waiver of consent<br>(N = 228) | Consented<br>(N = 372) |                    |
| <b>Age at injury</b>                                                   |                                |                        | 0.301 <sup>1</sup> |
| 5 - 12 years old                                                       | 57 (25.0%)                     | 108 (29.0%)            |                    |
| 13 - 18 years old                                                      | 171 (75.0%)                    | 264 (71.0%)            |                    |
| <b>Sex</b>                                                             |                                |                        | 0.064 <sup>1</sup> |
| Male                                                                   | 116 (50.9%)                    | 160 (43.0%)            |                    |
| Female                                                                 | 112 (49.1%)                    | 212 (57.0%)            |                    |
| <b>Total number of comorbidities<br/>(excluding seizures)</b>          |                                |                        | 0.586 <sup>2</sup> |
| 0                                                                      | 51 (22.4%)                     | 84 (22.6%)             |                    |
| 1                                                                      | 76 (33.3%)                     | 122 (32.8%)            |                    |
| 2                                                                      | 25 (11.0%)                     | 45 (12.1%)             |                    |
| 3 or more                                                              | 23 (10.1%)                     | 45 (12.1%)             |                    |
| Unknown                                                                | 53 (23.2%)                     | 76 (20.4%)             |                    |
| <sup>1</sup> Fisher's exact test.<br><sup>2</sup> Kruskal-Wallis test. |                                |                        |                    |

**eTable 2.** Comparison of Patients with Complete Data vs Those Who Were Lost to Observational Follow-Up

|                                                                        | Respond        |                  | P-value            |
|------------------------------------------------------------------------|----------------|------------------|--------------------|
|                                                                        | No<br>(N = 73) | Yes<br>(N = 271) |                    |
| <b>Age at injury</b>                                                   |                |                  | 0.240 <sup>1</sup> |
| 5 - 12 years old                                                       | 16 (21.9%)     | 80 (29.5%)       |                    |
| 13 - 18 years old                                                      | 57 (78.1%)     | 191 (70.5%)      |                    |
| <b>Sex</b>                                                             |                |                  | 0.894 <sup>1</sup> |
| Male                                                                   | 30 (41.1%)     | 116 (42.8%)      |                    |
| Female                                                                 | 43 (58.9%)     | 155 (57.2%)      |                    |
| <b>Total number of comorbidities<br/>(excluding seizures)</b>          |                |                  | 0.008 <sup>2</sup> |
| 0                                                                      | 8 (11.0%)      | 71 (26.2%)       |                    |
| 1                                                                      | 21 (28.8%)     | 90 (33.2%)       |                    |
| 2                                                                      | 13 (17.8%)     | 30 (11.1%)       |                    |
| 3 or more                                                              | 10 (13.7%)     | 31 (11.4%)       |                    |
| Unknown                                                                | 21 (28.8%)     | 49 (18.1%)       |                    |
| <sup>1</sup> Fisher's exact test.<br><sup>2</sup> Kruskal-Wallis test. |                |                  |                    |

**eTable 3.** Event Characteristics by Sex

|                                                                                                                             | Sex               |                     | Overall<br>(N = 600) | P-value            |
|-----------------------------------------------------------------------------------------------------------------------------|-------------------|---------------------|----------------------|--------------------|
|                                                                                                                             | Male<br>(N = 276) | Female<br>(N = 324) |                      |                    |
| <b>Time to initial clinic visit (days)</b>                                                                                  |                   |                     |                      | 0.876 <sup>1</sup> |
| N                                                                                                                           | 276               | 324                 | 600                  |                    |
| Median [Q1, Q3]                                                                                                             | 16.5 [8.5,29.0]   | 16.0 [8.0,29.0]     | 16.0 [8.0,29.0]      |                    |
| <b>Definite reported mechanism of injury</b>                                                                                |                   |                     |                      | 0.517 <sup>2</sup> |
| Yes (There was a discrete event with force to the head or rapid head movement without impact)                               | 271 (98.2%)       | 315 (97.2%)         | 586 (97.7%)          |                    |
| No (There was no discrete event)                                                                                            | 3 (1.1%)          | 6 (1.9%)            | 9 (1.5%)             |                    |
| Unknown                                                                                                                     | 2 (0.7%)          | 3 (0.9%)            | 5 (0.8%)             |                    |
| <b>Gradual recovery of symptoms over the first week of the injury</b>                                                       |                   |                     |                      | 0.001 <sup>2</sup> |
| Yes (There have been improving symptoms over the first week)                                                                | 164 (59.4%)       | 142 (43.8%)         | 306 (51.0%)          |                    |
| Yes (There have been stable symptoms over the first week)                                                                   | 88 (31.9%)        | 143 (44.1%)         | 231 (38.5%)          |                    |
| No (There have been worsening symptoms over the first week)                                                                 | 21 (7.6%)         | 32 (9.9%)           | 53 (8.8%)            |                    |
| Unknown                                                                                                                     | 3 (1.1%)          | 7 (2.2%)            | 10 (1.7%)            |                    |
| <b>Alternative explanation for the acute onset of symptoms</b>                                                              |                   |                     |                      | 0.766 <sup>2</sup> |
| Yes (acute alternative conditions: migraine, cervical injury, heatstroke, syncope, panic attack, intercurrent illness, etc) | 20 (7.2%)         | 30 (9.3%)           | 50 (8.3%)            |                    |
| No (concussion is the only likely cause for the acute onset of symptoms)                                                    | 241 (87.3%)       | 278 (85.8%)         | 519 (86.5%)          |                    |
| Unknown                                                                                                                     | 2 (0.7%)          | 4 (1.2%)            | 6 (1.0%)             |                    |
| <b>Mechanism/cause of injury</b>                                                                                            |                   |                     |                      | 0.366 <sup>2</sup> |
| Motor vehicle crash (MVC)                                                                                                   | 11 (4.0%)         | 17 (5.2%)           | 28 (4.7%)            |                    |
| Assault                                                                                                                     | 6 (2.2%)          | 6 (1.9%)            | 12 (2.0%)            |                    |
| Struck by or against object/person (non-assault, non-sport)                                                                 | 20 (7.2%)         | 35 (10.8%)          | 55 (9.2%)            |                    |
| Fall (non-sport)                                                                                                            | 26 (9.4%)         | 21 (6.5%)           | 47 (7.8%)            |                    |
| Sport/Recreation                                                                                                            | 210 (76.1%)       | 242 (74.7%)         | 452 (75.3%)          |                    |
| Unknown                                                                                                                     | 3 (1.1%)          | 3 (0.9%)            | 6 (1.0%)             |                    |
| <b>Retrograde Amnesia</b>                                                                                                   | 39 (14.1%)        | 40 (12.3%)          | 79 (13.2%)           | 0.390 <sup>2</sup> |
| <b>Anterograde Amnesia</b>                                                                                                  | 61 (22.1%)        | 55 (17.0%)          | 116 (19.3%)          | 0.091 <sup>2</sup> |

|                                                                           | Sex               |                     | Overall<br>(N = 600) | P-value            |
|---------------------------------------------------------------------------|-------------------|---------------------|----------------------|--------------------|
|                                                                           | Male<br>(N = 276) | Female<br>(N = 324) |                      |                    |
| <b>Loss of consciousness</b>                                              | 39 (14.1%)        | 30 (9.3%)           | 69 (11.5%)           | 0.052 <sup>2</sup> |
| <sup>1</sup> Wilcoxon rank-sum test.<br><sup>2</sup> Fisher's exact test. |                   |                     |                      |                    |

**eTable 4.** Event Characteristics by Age

|                                                                                                                             | Age Category                     |                                | Overall<br>(N = 600) | P-value            |
|-----------------------------------------------------------------------------------------------------------------------------|----------------------------------|--------------------------------|----------------------|--------------------|
|                                                                                                                             | 5 - 12 years<br>old<br>(N = 165) | 13 - 18 years old<br>(N = 435) |                      |                    |
| <b>Time to initial clinic visit (days)</b>                                                                                  |                                  |                                |                      | 0.736 <sup>1</sup> |
| N                                                                                                                           | 165                              | 435                            | 600                  |                    |
| Median [Q1, Q3]                                                                                                             | 17.0 [9.0,29.0]                  | 16.0 [8.0,29.0]                | 16.0 [8.0,29.0]      |                    |
| <b>Definite reported mechanism of injury</b>                                                                                |                                  |                                |                      | 1.000 <sup>2</sup> |
| Yes (There was a discrete event with force to the head or rapid head movement without impact)                               | 162 (98.2%)                      | 424 (97.5%)                    | 586 (97.7%)          |                    |
| No (There was no discrete event)                                                                                            | 2 (1.2%)                         | 7 (1.6%)                       | 9 (1.5%)             |                    |
| Unknown                                                                                                                     | 1 (0.6%)                         | 4 (0.9%)                       | 5 (0.8%)             |                    |
| <b>Gradual recovery of symptoms over the first week of the injury</b>                                                       |                                  |                                |                      | 0.467 <sup>2</sup> |
| Yes (There have been improving symptoms over the first week)                                                                | 90 (54.5%)                       | 216 (49.7%)                    | 306 (51.0%)          |                    |
| Yes (There have been stable symptoms over the first week)                                                                   | 57 (34.5%)                       | 174 (40.0%)                    | 231 (38.5%)          |                    |
| No (There have been worsening symptoms over the first week)                                                                 | 14 (8.5%)                        | 39 (9.0%)                      | 53 (8.8%)            |                    |
| Unknown                                                                                                                     | 4 (2.4%)                         | 6 (1.4%)                       | 10 (1.7%)            |                    |
| <b>Alternative explanation for the acute onset of symptoms</b>                                                              |                                  |                                |                      | 0.537 <sup>2</sup> |
| Yes (acute alternative conditions: migraine, cervical injury, heatstroke, syncope, panic attack, intercurrent illness, etc) | 14 (8.5%)                        | 36 (8.3%)                      | 50 (8.3%)            |                    |
| No (concussion is the only likely cause for the acute onset of symptoms)                                                    | 145 (87.9%)                      | 374 (86.0%)                    | 519 (86.5%)          |                    |
| Unknown                                                                                                                     | 2 (1.2%)                         | 4 (0.9%)                       | 6 (1.0%)             |                    |
| <b>Mechanism/cause of injury</b>                                                                                            |                                  |                                |                      | <.001 <sup>2</sup> |
| Motor vehicle crash (MVC)                                                                                                   | 8 (4.8%)                         | 20 (4.6%)                      | 28 (4.7%)            |                    |
| Assault                                                                                                                     | 4 (2.4%)                         | 8 (1.8%)                       | 12 (2.0%)            |                    |
| Struck by or against object/person (non-assault, non-sport)                                                                 | 25 (15.2%)                       | 30 (6.9%)                      | 55 (9.2%)            |                    |
| Fall (non-sport)                                                                                                            | 26 (15.8%)                       | 21 (4.8%)                      | 47 (7.8%)            |                    |
| Sport/Recreation                                                                                                            | 100 (60.6%)                      | 352 (80.9%)                    | 452 (75.3%)          |                    |
| Unknown                                                                                                                     | 2 (1.2%)                         | 4 (0.9%)                       | 6 (1.0%)             |                    |
| <b>Retrograde Amnesia</b>                                                                                                   | 17 (10.3%)                       | 62 (14.3%)                     | 79 (13.2%)           | 0.483 <sup>2</sup> |
| <b>Anterograde Amnesia</b>                                                                                                  | 35 (21.2%)                       | 81 (18.6%)                     | 116 (19.3%)          | 0.187 <sup>2</sup> |

|                                                                           | Age Category                  |                                | Overall<br>(N = 600) | P-value            |
|---------------------------------------------------------------------------|-------------------------------|--------------------------------|----------------------|--------------------|
|                                                                           | 5 - 12 years old<br>(N = 165) | 13 - 18 years old<br>(N = 435) |                      |                    |
| <b>Loss of consciousness</b>                                              | 23 (13.9%)                    | 46 (10.6%)                     | 69 (11.5%)           | 0.142 <sup>2</sup> |
| <sup>1</sup> Wilcoxon rank-sum test.<br><sup>2</sup> Fisher's exact test. |                               |                                |                      |                    |

**eTable 5.** Acute Injury Severity Surrogates

|                                      | Overall<br>(N = 600) |
|--------------------------------------|----------------------|
| <b>Imaging done</b>                  |                      |
| CT and MRI                           | 9 (1.5%)             |
| CT                                   | 105 (17.5%)          |
| MRI                                  | 14 (2.3%)            |
| Unknown                              | 35 (5.8%)            |
| None                                 | 434 (72.3%)          |
| Unknown                              | 3 (0.5%)             |
| <b>Findings of the CT</b>            | (N=114)              |
| Normal                               | 92 (80.7%)           |
| Abnormal                             | 18 (15.8%)           |
| Unknown                              | 4 (3.5%)             |
| <b>Findings of the MRI</b>           | (N=23)               |
| Normal                               | 18 (78.3%)           |
| Abnormal                             | 5 (21.7%)            |
| <b>Retrograde Amnesia</b>            |                      |
| No                                   | 444 (74.0%)          |
| Yes                                  | 79 (13.2%)           |
| Unknown                              | 77 (12.8%)           |
| <b>Length of retrograde amnesia</b>  | (N=79)               |
| ≤ 1 minute                           | 8 (10.1%)            |
| > 1 minute - 20 minutes              | 4 (5.1%)             |
| > 20 minutes - 1 hour                | 9 (11.4%)            |
| > 1 hour - 24 hours                  | 11 (13.9%)           |
| > 1 day - 7 days                     | 8 (10.1%)            |
| More than 7 days                     | 12 (15.2%)           |
| Unknown                              | 27 (34.2%)           |
| <b>Anterograde Amnesia</b>           |                      |
| No                                   | 410 (68.3%)          |
| Yes                                  | 116 (19.3%)          |
| Unknown                              | 74 (12.3%)           |
| <b>Length of anterograde amnesia</b> | (N=116)              |



|                                    |                      |
|------------------------------------|----------------------|
|                                    | Overall<br>(N = 600) |
| ≤ 1 minute                         | 8 (6.9%)             |
| > 1 minute - 20 minutes            | 18 (15.5%)           |
| > 20 minutes - 1 hour              | 16 (13.8%)           |
| > 1 hour - 24 hours                | 18 (15.5%)           |
| > 1 day - 7 days                   | 12 (10.3%)           |
| More than 7 days                   | 10 (8.6%)            |
| Unknown                            | 34 (29.3%)           |
| <b>Loss of consciousness (LOC)</b> |                      |
| No                                 | 472 (78.7%)          |
| Yes                                | 69 (11.5%)           |
| Unknown                            | 59 (9.8%)            |
| <b>Length of LOC</b><br>(N=69)     |                      |
| Less than 1 minute                 | 38 (55.1%)           |
| Between 1-5 minutes                | 14 (20.3%)           |
| Greater than 5 minutes             | 5 (7.2%)             |
| Unknown                            | 12 (17.4%)           |

CT: computerized tomography; MRI: magnetic resonance imaging

**eTable 6.** Sex and History of Emotional Distress Interaction

| Obs | Parameter                            | ClassVal0 | ClassVal1 | DF | Estimate | StdErr  | ChiSq  | ProbChiSq | HazardRatio | Label                              |
|-----|--------------------------------------|-----------|-----------|----|----------|---------|--------|-----------|-------------|------------------------------------|
| 1   | Gender                               | Female    |           | 1  | -0.12998 | 0.22861 | 0.3233 | 0.5697    | .           | Gender Female                      |
| 2   | History of Emotional Distress        | No        |           | 1  | 0.34848  | 0.20439 | 2.9070 | 0.0882    | .           | Mental Distress No                 |
| 3   | Gender*History of Emotional Distress | Female    | No        | 1  | -0.05769 | 0.25940 | 0.0495 | 0.8240    | .           | Gender Female * Mental Distress No |

**eTable 7. Sex and History of Migraine Interaction**

| Obs | Parameter               | ClassVal0 | ClassVal1 | DF | Estimate | StdErr  | ChiSq  | ProbChiSq | HazardRatio | Label                        |
|-----|-------------------------|-----------|-----------|----|----------|---------|--------|-----------|-------------|------------------------------|
| 1   | Gender                  | Female    |           | 1  | -0.42414 | 0.30227 | 1.9690 | 0.1606    | .           | Gender Female                |
| 2   | HistoryMigraines        | No        |           | 1  | 0.33680  | 0.25738 | 1.7123 | 0.1907    | .           | Migraines No                 |
| 3   | Gender*HistoryMigraines | Female    | No        | 1  | 0.21084  | 0.32383 | 0.4239 | 0.5150    | .           | Gender Female * Migraines No |
